# Supplementary material for: Insight into thiophene hydrodesulfurization on clean and S-modified MoP(010): a periodic density functional theory study
Source: Royal Society of Chemistry journal article supplement (doi:10.1039/c7cp01859b), 2017-01-01
Supplement: c7cp01859b1.pdf [file c7cp01859b1.pdf]

## Supporting Information

### **Insight into the thiophene hydrodesulfurization on clean and S-modified MoP(010): a periodic density functional theory study**

Guixia Li,<sup>a,b</sup> Lianming Zhao,<sup>a</sup> Houyu Zhu,<sup>\*a</sup> Xiuping Liu,<sup>a</sup> Huifang Ma,<sup>a</sup> Yanchen Yu,<sup>a</sup> and Wenyue Guo<sup>\*a</sup>

*<sup>a</sup>College of Science, China University of Petroleum, Qingdao, Shandong 266580, P. R. China*

*<sup>b</sup>College of Science and Information, Qingdao Agricultural University, Qingdao, Shandong 266109, P. R. China*

\*Corresponding authors

E-mail address: [hyzhu@upc.edu.cn](mailto:hyzhu@upc.edu.cn) (H. Z.); [wgyuo@upc.edu.cn](mailto:wgyuo@upc.edu.cn) (W. G.)

Telephone: 86-532-8698-1334; Fax numbers: 86-532-8698-3363

## Section 1. The calculation for surface energy

The exposed Mo-terminated surfaces of the MoP crystal mainly include (111), (100), (001), (010), (102) and (201) surfaces. Generally, a catalytic reaction starts from stable adsorption of reactants. For the (111), (102) and (201) surfaces, the average distance of the adjacent surface Mo-Mo is  $\sim 5.38 \text{ \AA}$ , which is significantly larger than the molecular dimension of thiophene (ca.  $4.11 \text{ \AA}$ ) and not suitable for the stable adsorption of thiophene. In contrast, the (100), (001) and (010) surfaces involve more compact atomic arrangement of surface Mo atoms (ca.  $3.24 \text{ \AA}$  for the adjacent Mo-Mo distance), indicating that these surfaces could stably adsorb thiophene molecule and exhibit catalytic activity. Thus, the (100), (001) and (010) surfaces are appropriate models to simulate the MoP catalyst. Generally, the surface with high surface energy is unstable. We calculate the surface energies for the Mo-terminated (100), (001) and (010) surfaces based on the following formula<sup>1,2</sup>:

$$E_{\text{surf}} = (E_{\text{slab}} - E_{\text{bulk}})/2S \quad (1)$$

where  $E_{\text{surf}}$ ,  $E_{\text{slab}}$ ,  $E_{\text{bulk}}$  and  $S$  represent the surface energy, the calculated electronic energies of the slab and the bulk, and the surface area, respectively. The calculated surface energies are 19.40, 10.74 and 11.08 eV/ $\text{\AA}^2$  for the (100), (001) and (010) surfaces, respectively. Thus, the (001) and (010) surfaces could be formed more easily compared to the (100) surface, and are more appropriate to be used as surface model for MoP catalyst.

## Section 2. Test for the calculation parameters

We chose thiophene in the T-hollow-top adsorption geometry, the most stable configuration on clean MoP(010) (see Table 1), to carry out the following test calculations. (1) A  $(3 \times 3 \times 2)$   $k$ -points test showed that the employed  $(2 \times 2 \times 1)$   $k$ -points are accurate enough for the surface calculations (the adsorption energy difference was less than 0.03 eV). (2) We also tested the effect of zero point energy (ZPE) correction, which is less than 0.02 eV for the adsorption energy and less than 0.05 eV for the C-S bond scission energy barrier. Therefore, ZPE corrections were not included in the present study. The calculated geometrical parameters of the gas-phase thiophene, under the current computational conditions, are almost the same as

the experimental values (the largest difference is less than 0.02 Å, see Table S1).

**Table S1 Bond lengths (in Å) calculated and experimental values for the free thiophene molecule**

| Thiophene         | C <sup>2</sup> -S/C <sup>5</sup> -S | C <sup>2</sup> -C <sup>3</sup> /C <sup>4</sup> -C <sup>5</sup> | C <sup>3</sup> -C <sup>4</sup> |
|-------------------|-------------------------------------|----------------------------------------------------------------|--------------------------------|
| Theory            | 1.728                               | 1.374                                                          | 1.422                          |
| Exp. <sup>3</sup> | 1.714                               | 1.378                                                          | 1.427                          |

### Section 3. Energy barrier analysis

Upon adsorption, the geometry of the molecule and the surface are changed somewhat compared with those in the non-interacting systems. The adsorption energy of the adsorbates can be partitioned into three terms using the following formula:<sup>1</sup>

$$\Delta E_{\text{ads}} = E_{\text{int}} + \delta E_{\text{ads}} + \delta E_{\text{surf}} \quad (2)$$

$$E_{\text{int}} = E_{\text{ads/surf}} - E_{\text{ads}^*} - E_{\text{surf}^*} \quad (3)$$

$$\delta E_{\text{ads}} = E_{\text{ads}^*} - E_{\text{ads}} \quad (4)$$

$$\delta E_{\text{surf}} = E_{\text{surf}^*} - E_{\text{surf}} \quad (5)$$

where  $E_{\text{int}}$  is the interaction energy between the surface and the adsorbate at the adsorbed geometries,  $E_{\text{ads}}$  and  $E_{\text{ads}^*}$  are the total energies of the adsorbate at the free and adsorbed structures, respectively.  $E_{\text{surf}}$  and  $E_{\text{surf}^*}$  are the total energies of the surface at the free and adsorbed geometries, respectively. Thus,  $\delta E_{\text{ads}}$  and  $\delta E_{\text{surf}}$  are the distortion energies of the adsorbate and the surface in the adsorption process, reflecting the energy cost for the adjustment of the relevant species structures in the adsorption process.

The energy barrier ( $E_a$ ) of a step was calculated according to the following formula:

$$E_a = E_{\text{ads/surf}}^{\text{TS}} - E_{\text{ads/surf}}^{\text{IS}} \quad (6)$$

where  $E_{\text{ads/surf}}^{\text{IS}}$  and  $E_{\text{ads/surf}}^{\text{TS}}$  are total energies of the initial state (IS) and TS, respectively. The adsorption energy also can be expressed as:

$$\Delta E_{\text{ads}} = E_{\text{ads/surf}} - E_{\text{ads}} - E_{\text{surf}} \quad (7)$$

where,  $E_{\text{ads}}$  and  $E_{\text{surf}}$  correspond to the energy of the gas-phase thiophene and free surface, respectively.

According to the equations (2) – (7), the  $E_a$  can be expressed as follows:

$$E_a = \Delta E_{\text{ads}}^{\text{TS}} - \Delta E_{\text{ads}}^{\text{IS}} = (\delta E_{\text{ads}}^{\text{TS}} + \delta E_{\text{surf}}^{\text{TS}} + E_{\text{int}}^{\text{TS}}) - (\delta E_{\text{ads}}^{\text{IS}} + \delta E_{\text{surf}}^{\text{IS}} + E_{\text{int}}^{\text{IS}}) \quad (8)$$

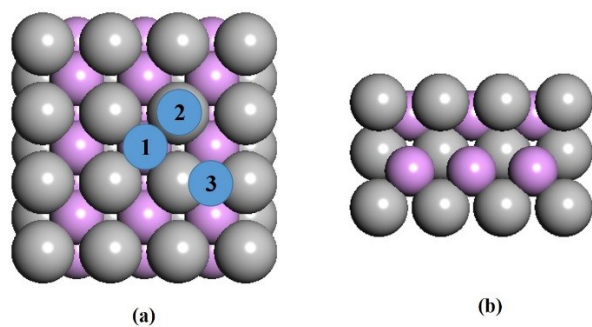

**Fig. S1** The structures of Mo-terminated MoP(010) surface model: (a) top view and (b) side view, 1-3 represent the adsorption sites of hollow, top and bridge, respectively. Light-gray and purple denote Mo and P, respectively.

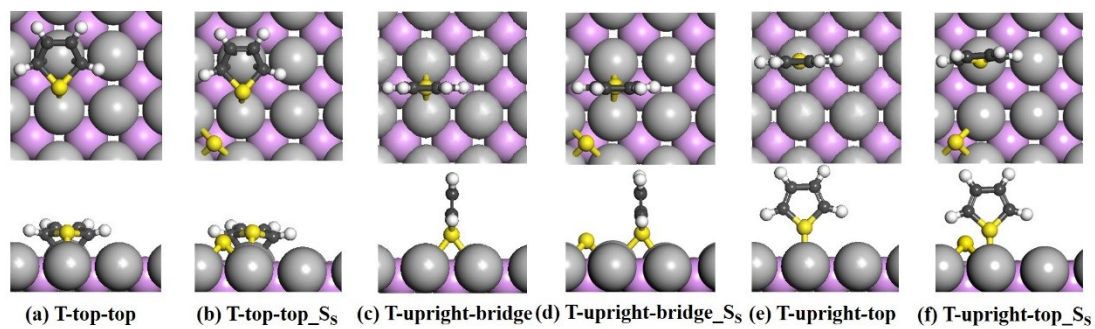

**Fig. S2** The adsorption structures of the T-top-top, T-upright-bridge and T-upright-top configurations of thiophene on clean and S-modified MoP(010). Captions are the same as in Fig. 1.

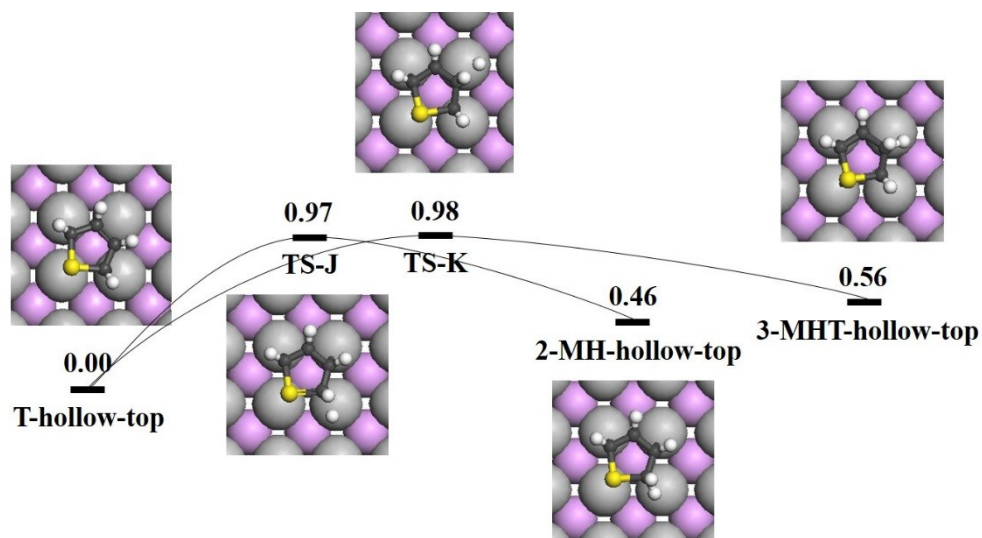

**Fig. S3** Initial hydrogenation pathway of thiophene from T-hollow-top. Captions are the same as in Fig. 2.

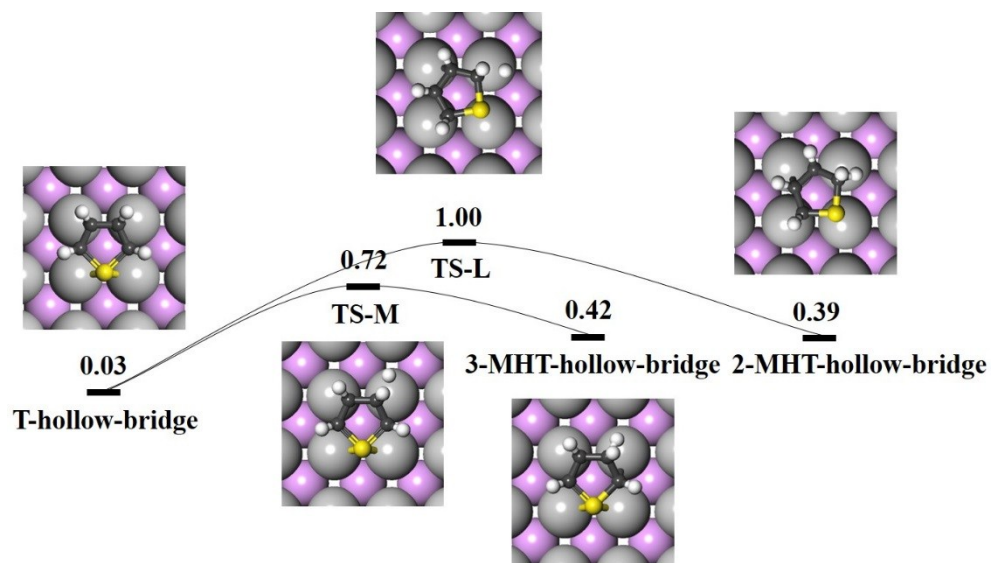

**Fig. S4** Initial hydrogenation pathway of thiophene from T-hollow-bridge. Captions are the same as in Fig. 2.



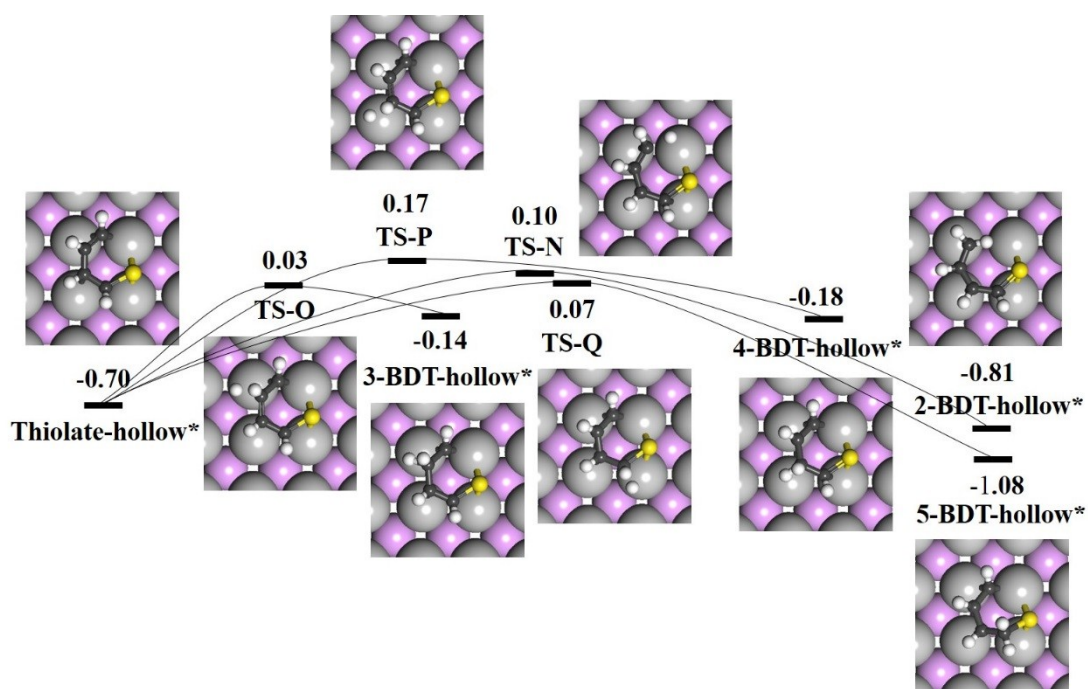

**Fig. S5** Initial hydrogenation pathway of thiophene from Thiolate-hollow\*, BDT represents the hydrogenation product (butadienethiolate). Captions are the same as in Fig. 2.

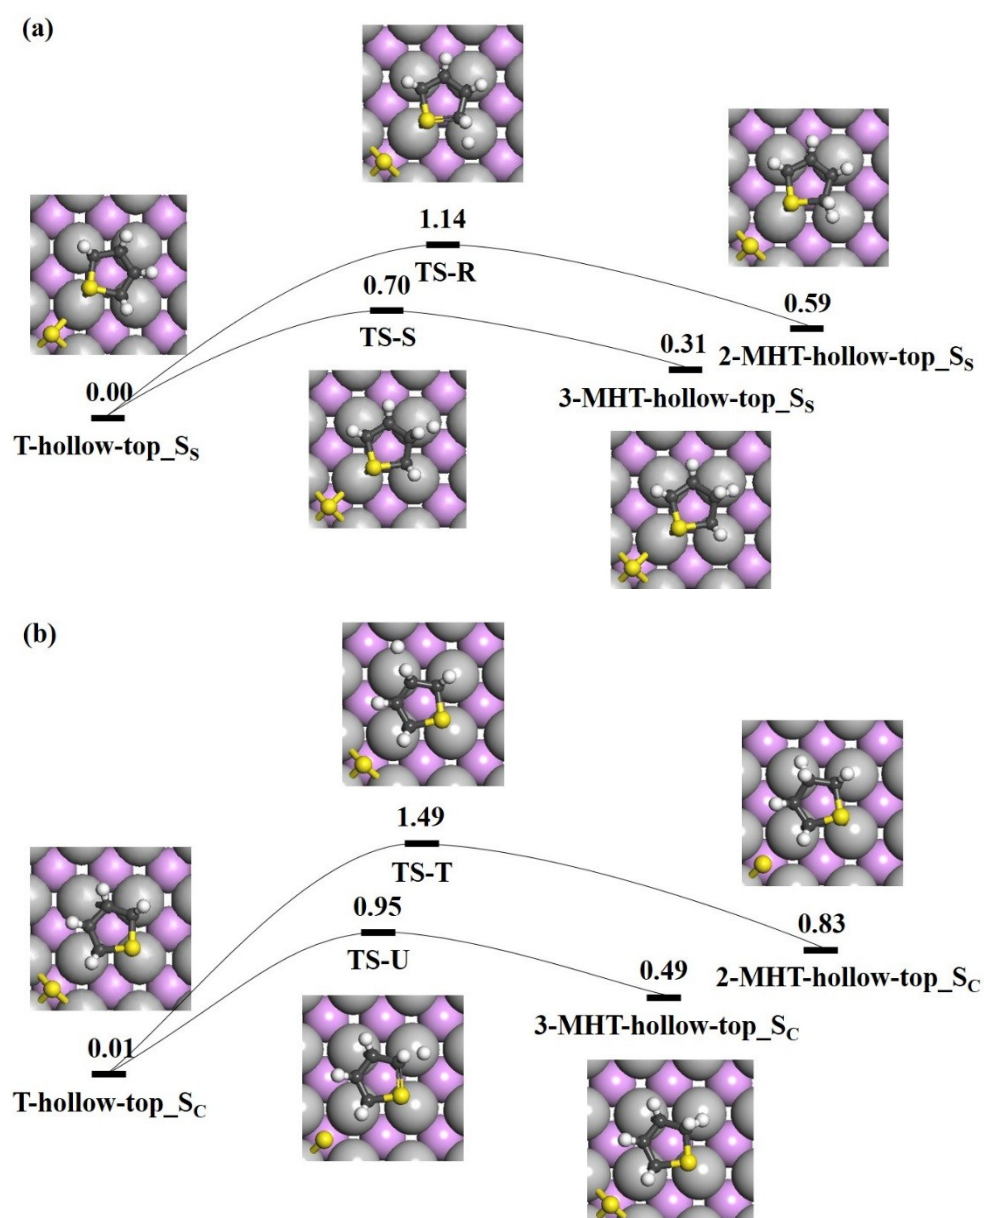

**Fig. S6** Initial hydrogenation pathway of thiophene from (a) T-hollow-top\_S<sub>s</sub> and (b) T-hollow-top\_S<sub>c</sub>. Captions are the same as in Fig. 2.

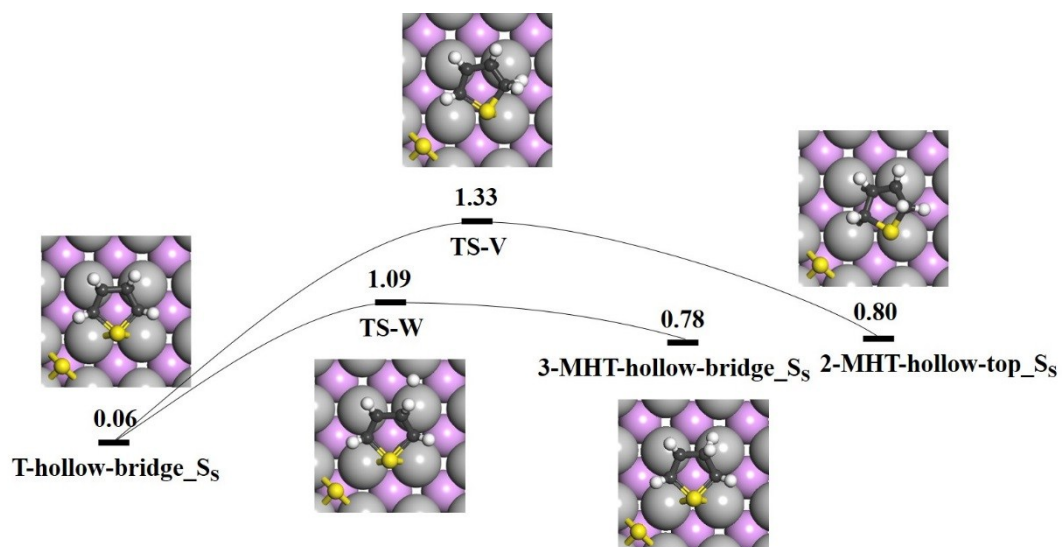

**Fig. S7** Initial hydrogenation pathway of thiophene from T-hollow-bridge\_Ss. Captions are the same as in Fig. 2.

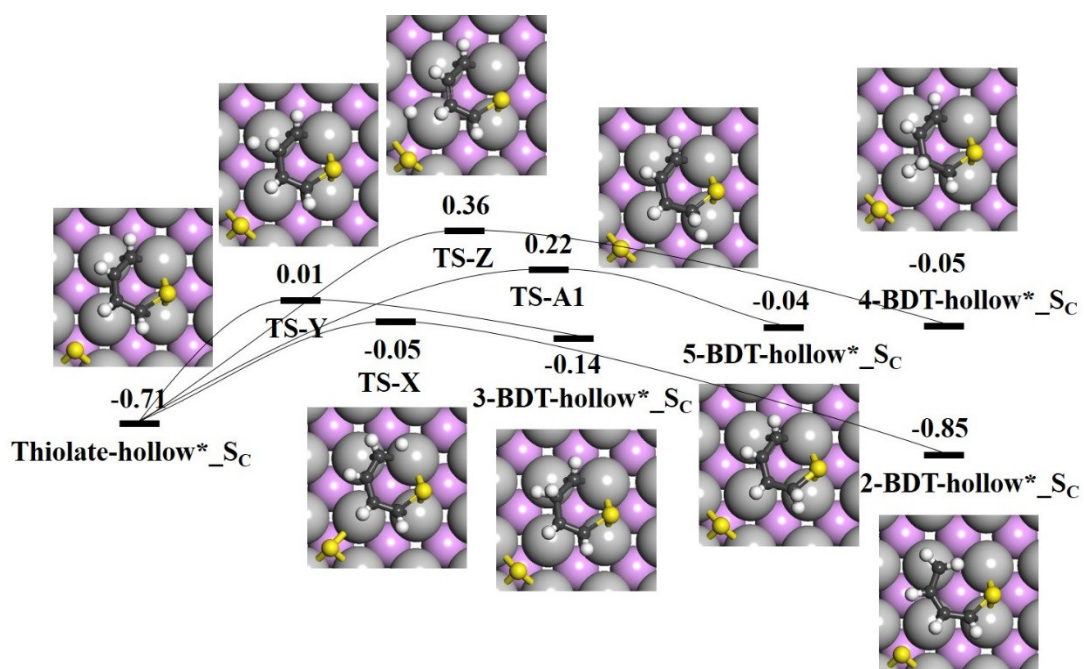

**Fig. S8** Initial hydrogenation pathway of thiophene from Thiolate-hollow\*\_SC. Captions are the same as in Fig. 2.

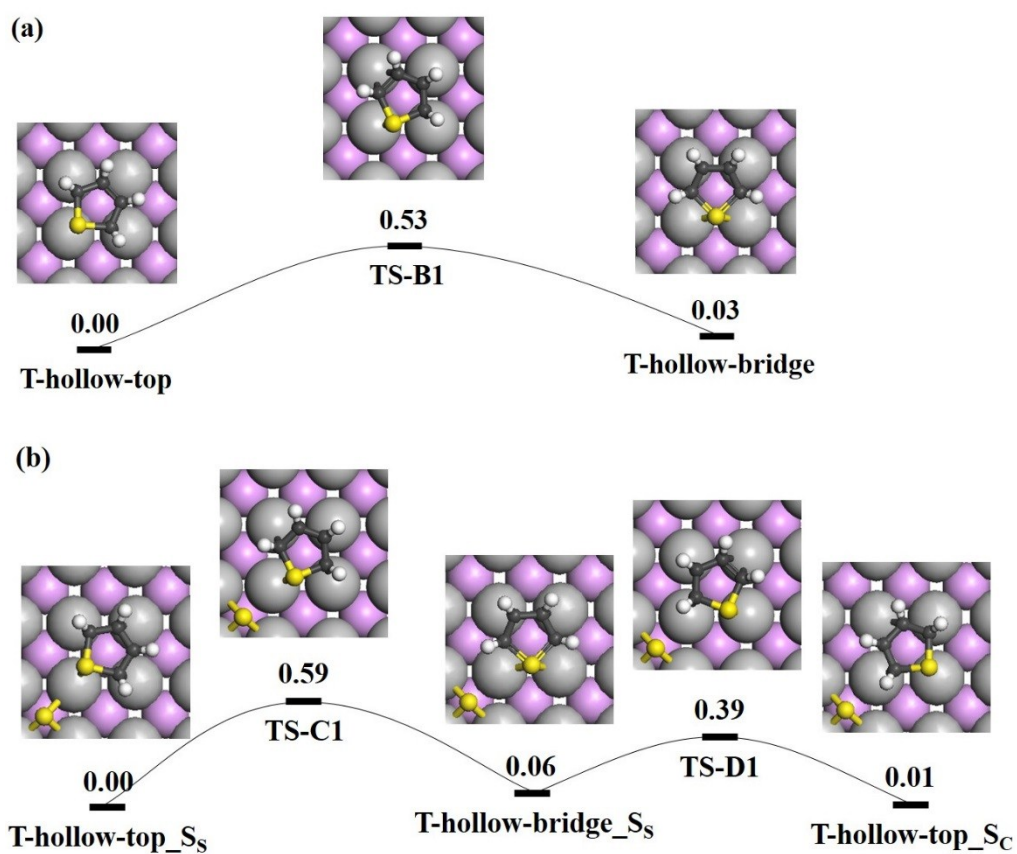

**Fig. S9** Conversion pathways between the T-hollow-top and T-hollow-bridge configurations of thiophene on (a) clean and (b) S-modified MoP(010). Captions are the same as in Fig. 2.

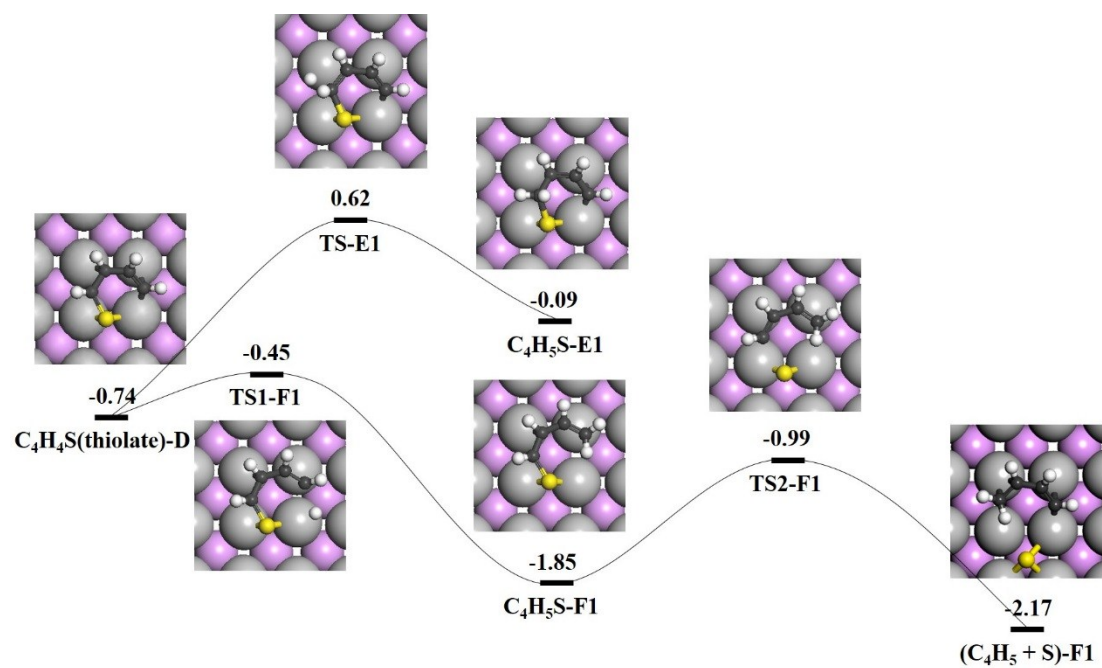

**Fig. S10** Hydrogenation and subsequent C-S bond scission pathways of thiolate from  $\text{C}_4\text{H}_4\text{S}$  (thiolate-D). Captions are the same as in Fig. 2.

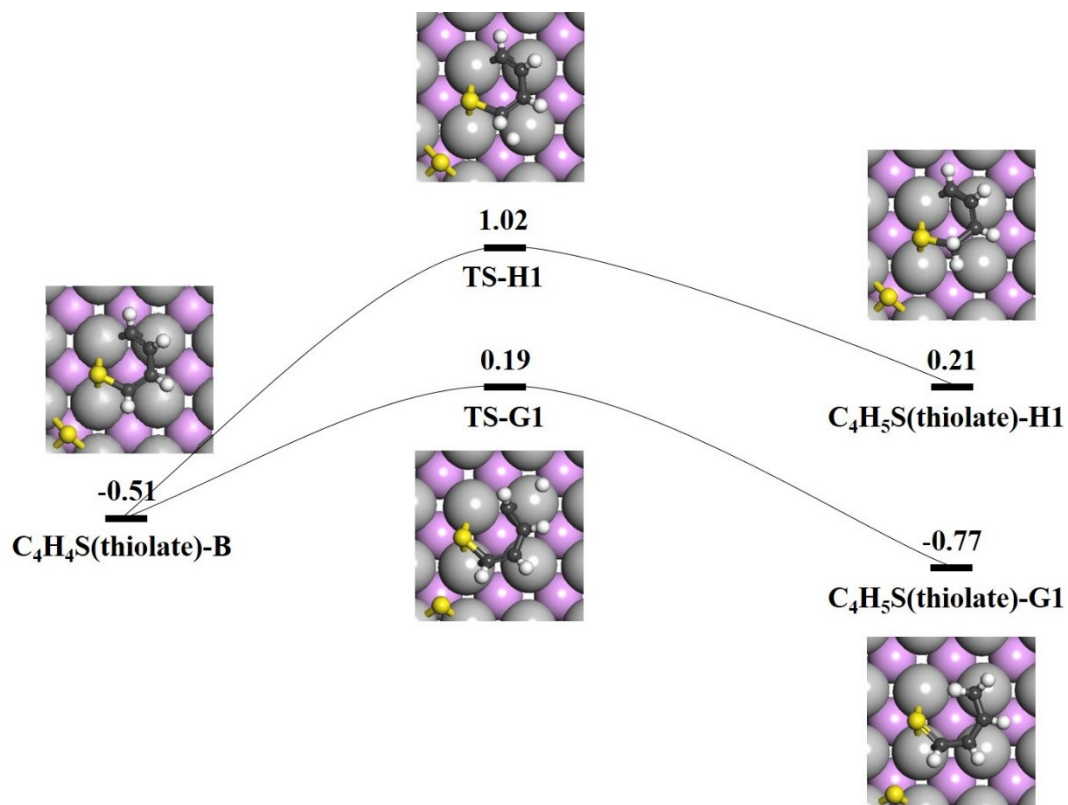

**Fig. S11** Hydrogenation and subsequent C–S bond scission pathways of thiolate from C<sub>4</sub>H<sub>4</sub>S (thiolate–B). Captions are the same as in Fig. 2.



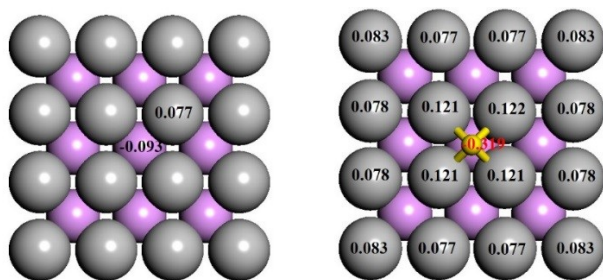

**Fig. S12** Mulliken charges (in  $e$ ) of the surface metal atoms and surface S atom on clean and S-modified MoP(010) surfaces.



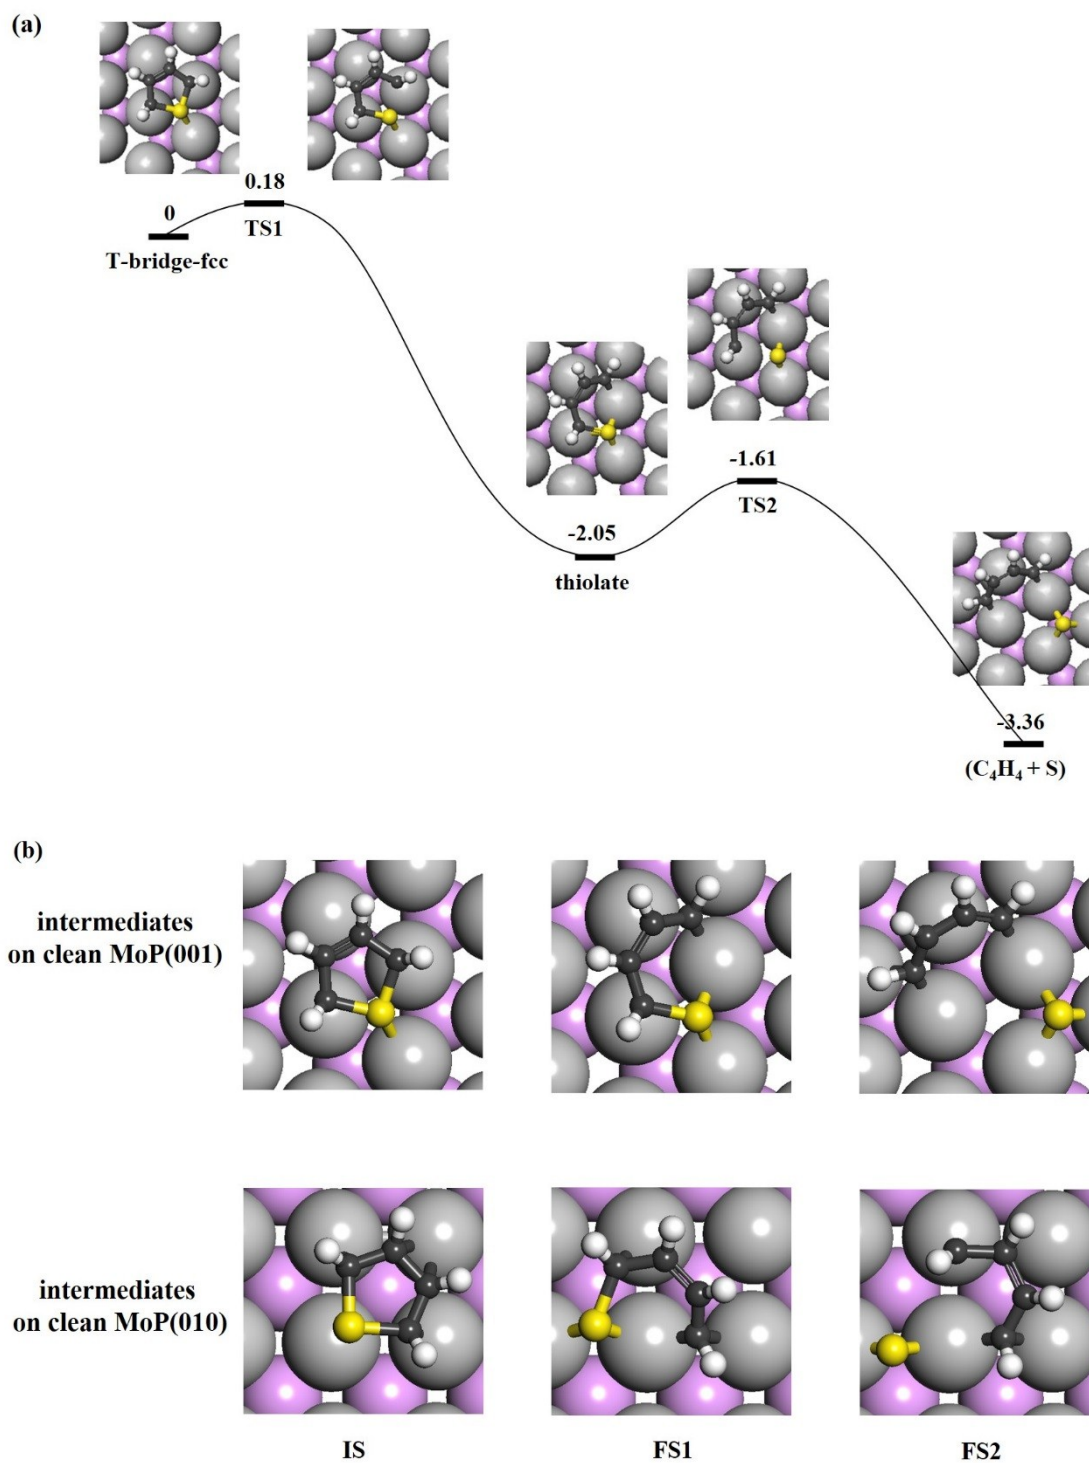

**Fig. S13** (a) The direct desulfurization pathway of thiophene from T-bridge-fcc on clean MoP(001).<sup>4</sup> (b) The intermediates involved in the desulfurization of thiophene from T-bridge-fcc and T-hollow-top configurations on clean MoP(001) and MoP(010) surfaces, respectively.

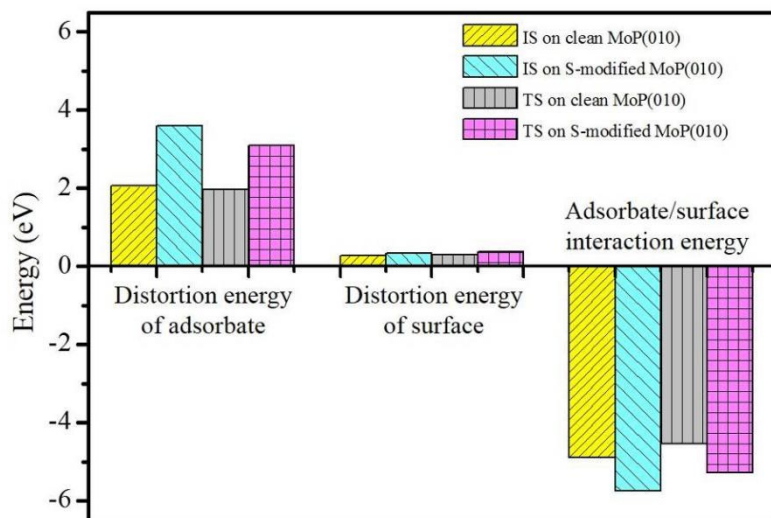

**Fig. S14** Decomposition of the adsorption energies for the IS and TS of the initial C–S bond scission of thiophene from T-hollow-top on the clean and S-modified MoP(010) surfaces.

**Table S2 Adsorption configurations, adsorption energies ( $\Delta E_{\text{ads}}$ , eV), structural parameters (Å), and Mulliken populations ( $e$ ) for thiophene on clean and S-modified MoP(010)**

| Sites                         | $\Delta E_{\text{ads}}$ | $d(\text{S-Mo})$ | $d(\text{C-Mo})$           | $d(\text{C}^2\text{-S})$ | $d(\text{C}^5\text{-S})$ | $d(\text{C}^2\text{-C}^3)$ | $d(\text{C}^3\text{-C}^4)$ | $d(\text{C}^4\text{-C}^5)$ | Charges |
|-------------------------------|-------------------------|------------------|----------------------------|--------------------------|--------------------------|----------------------------|----------------------------|----------------------------|---------|
| gas                           | –                       | –                | –                          | 1.728                    | 1.728                    | 1.374                      | 1.422                      | 1.374                      | 0       |
| top-top                       | –1.51                   | 2.400            | 2.244, 2.400, 2.400, 2.244 | 1.909                    | 1.908                    | 1.431                      | 1.404                      | 1.430                      | 0.017   |
| top-top_S <sub>S</sub>        | –1.25                   | 2.490            | 2.271, 2.393, 2.397, 2.266 | 1.862                    | 1.887                    | 1.433                      | 1.400                      | 1.431                      | 0.118   |
| upright-bridge                | –1.02                   | 2.541, 2.538     | –                          | 1.758                    | 1.757                    | 1.360                      | 1.442                      | 1.360                      | 0.144   |
| upright-bridge_S <sub>S</sub> | –0.92                   | 2.623, 2.498     | –                          | 1.758                    | 1.756                    | 1.360                      | 1.440                      | 1.360                      | 0.170   |
| upright-top                   | –0.90                   | 2.403            | –                          | 1.729                    | 1.728                    | 1.375                      | 1.425                      | 1.374                      | 0.082   |
| upright-top_S <sub>S</sub>    | –0.90                   | 2.392            | –                          | 1.731                    | 1.730                    | 1.372                      | 1.428                      | 1.372                      | 0.096   |

**Table S3 Adsorption energy ( $\Delta E_{\text{ads}}$ , eV) for surface S atom, and the hydrogenation products of  $\text{C}_4\text{H}_4$  on clean MoP(010), MoP(001) and S-modified MoP(010)**

| Species                                 | Sites      | $\Delta E_{\text{ads}}$ |                     |                             |
|-----------------------------------------|------------|-------------------------|---------------------|-----------------------------|
|                                         |            | Clean MoP(010)          | S-modified MoP(010) | Clean MoP(001) <sup>4</sup> |
| S                                       | hollow     | -5.17                   | -4.94               | -6.23/-6.47                 |
|                                         | bridge     | -5.13                   | -4.83               | -                           |
|                                         | top        | -4.53                   | -                   | -                           |
| $\text{C}_4\text{H}_4$                  | hollow     | -4.77/-4.53             | -4.55               | -5.67/-5.96                 |
| $\text{C}_4\text{H}_6$                  | hollow     | -2.64                   | -2.41               | -2.84/-3.44                 |
|                                         | top        | -2.23                   | -1.79               | -                           |
| <i>trans</i> -2- $\text{C}_4\text{H}_8$ | hollow-top | -1.30                   | -1.28               | -1.53                       |
| <i>cis</i> -2- $\text{C}_4\text{H}_8$   | -          | -1.30/-0.98             | -0.78/-0.76         | -1.22                       |

**Table S4 C–S distances (Å) in desulfurization reactions of adsorbed thiophene on clean and S-modified MoP(010)**

| Reactants                       | Intermediates                                         | $d(\text{C}^2\text{--S})$ | $d(\text{C}^5\text{--S})$ |
|---------------------------------|-------------------------------------------------------|---------------------------|---------------------------|
| T-hollow-top                    | T-hollow-top                                          | 1.835                     | 1.840                     |
|                                 | TS1-A                                                 | 2.391                     | 1.774                     |
|                                 | C <sub>4</sub> H <sub>4</sub> S(thiolate)-A           | 3.060                     | 1.850                     |
|                                 | TS2-A                                                 | 3.177                     | 2.483                     |
|                                 | (C <sub>4</sub> H <sub>4</sub> + S)-A                 | 3.408                     | 3.570                     |
| T-hollow-top_S <sub>S</sub>     | T-hollow-top_S <sub>S</sub>                           | 1.819                     | 1.844                     |
|                                 | TS1-B                                                 | 1.814                     | 2.229                     |
|                                 | C <sub>4</sub> H <sub>4</sub> S (thiolate)-B          | 1.817                     | 2.848                     |
|                                 | TS2-B                                                 | 2.348                     | 2.966                     |
|                                 | (C <sub>4</sub> H <sub>4</sub> + S)_S <sub>S</sub> -B | 3.675                     | 3.500                     |
| T-hollow-top_S <sub>C</sub>     | T-hollow-top_S <sub>C</sub>                           | 1.838                     | 1.830                     |
|                                 | TS1-C                                                 | 1.811                     | 2.555                     |
|                                 | C <sub>4</sub> H <sub>4</sub> S (thiolate)-C          | 1.800                     | 3.174                     |
|                                 | TS2-C                                                 | 2.374                     | 3.328                     |
|                                 | (C <sub>4</sub> H <sub>4</sub> + S)_S <sub>C</sub> -C | 3.235                     | 3.621                     |
| T-hollow-bridge                 | T-hollow-bridge                                       | 1.902                     | 1.898                     |
|                                 | TS1-D                                                 | 1.991                     | 1.888                     |
|                                 | C <sub>4</sub> H <sub>4</sub> S(thiolate)-D           | 2.897                     | 1.805                     |
|                                 | TS2-D                                                 | 3.228                     | 2.620                     |
|                                 | (C <sub>4</sub> H <sub>4</sub> + S)-D                 | 3.578                     | 3.589                     |
| T-hollow-bridge_S <sub>S</sub>  | T-hollow-bridge_S <sub>S</sub>                        | 1.866                     | 1.919                     |
|                                 | TS1-E                                                 | 1.860                     | 2.007                     |
|                                 | C <sub>4</sub> H <sub>4</sub> S (thiolate)-E          | 1.806                     | 2.919                     |
|                                 | TS2-E                                                 | 2.389                     | 3.129                     |
|                                 | (C <sub>4</sub> H <sub>4</sub> + S)_S <sub>S</sub> -E | 3.557                     | 3.696                     |
| Thiolate-hollow*                | Thiolate-hollow*                                      | 2.890                     | 1.820                     |
|                                 | TS-F                                                  | 3.045                     | 2.340                     |
|                                 | (C <sub>4</sub> H <sub>4</sub> + S)-F                 | 3.577                     | 3.582                     |
| Thiolate-hollow*_S <sub>C</sub> | Thiolate-hollow*_S <sub>C</sub>                       | 2.896                     | 1.818                     |
|                                 | TS-G                                                  | 3.046                     | 2.310                     |
|                                 | (C <sub>4</sub> H <sub>4</sub> + S)_S <sub>C</sub> -G | 3.525                     | 3.499                     |

**Table S5 Distortion energy of adsorbate ( $\delta E_{\text{ads}}$ , eV), distortion energy of surface ( $\delta E_{\text{surf}}$ , eV), adsorbate/surface interaction energy ( $E_{\text{int}}$ , eV), adsorption energy ( $\Delta E_{\text{ads}}$ , eV) for the IS, FS1 and FS2 involved in products of the first and second C–S scissions of thiophene from T-bridge-fcc on clean MoP(001)<sup>4</sup> and T-hollow-top on clean MoP(010) surfaces**

| Configurations | IS <sup>a</sup>         |                          |                  |                         | FS1 <sup>a</sup>        |                          |                  |                         | FS2 <sup>b</sup>        |                          |                  |                         |
|----------------|-------------------------|--------------------------|------------------|-------------------------|-------------------------|--------------------------|------------------|-------------------------|-------------------------|--------------------------|------------------|-------------------------|
|                | $\delta E_{\text{ads}}$ | $\delta E_{\text{surf}}$ | $E_{\text{int}}$ | $\Delta E_{\text{ads}}$ | $\delta E_{\text{ads}}$ | $\delta E_{\text{surf}}$ | $E_{\text{int}}$ | $\Delta E_{\text{ads}}$ | $\delta E_{\text{ads}}$ | $\delta E_{\text{surf}}$ | $E_{\text{int}}$ | $\Delta E_{\text{ads}}$ |
| T-bridge-fcc   | 1.85                    | 0.12                     | -4.57            | -2.60                   | 5.00                    | 0.45                     | -10.10           | -4.65                   | 1.57                    | 0.63                     | -16.02           | -13.82                  |
| T-hollow-top   | 2.06                    | 0.28                     | -4.89            | -2.55                   | 4.99                    | 0.29                     | -8.25            | -2.97                   | 1.86                    | 0.57                     | -13.65           | -11.22                  |

<sup>a</sup>The gas-phase adsorbate in  $\delta E_{\text{ads}}$  and  $\Delta E_{\text{ads}}$  corresponds to the gas-phase thiophene. <sup>b</sup>The gas-phase adsorbate in  $\delta E_{\text{ads}}$  and  $\Delta E_{\text{ads}}$  corresponds to gas-phase (C<sub>4</sub>H<sub>4</sub> + S), respectively.

**Table S6 Distortion energy of adsorbate ( $\delta E_{\text{ads}}$ , eV), distortion energy of surface ( $\delta E_{\text{surf}}$ , eV), and adsorbate/surface interaction energy ( $E_{\text{int}}$ , eV) in the IS and TS involved in the first C–S bond scission of thiophene from T-hollow-top on clean and S-modified MoP(010) surfaces**

| Surfaces            | $\delta E_{\text{ads}}$ |      | $\delta E_{\text{surf}}$ |      | $E_{\text{int}}$ |       | $E_{\text{a1}}$ | $E_{\text{a2}}$ | $E_{\text{a3}}$ | $E_{\text{a}}$ |
|---------------------|-------------------------|------|--------------------------|------|------------------|-------|-----------------|-----------------|-----------------|----------------|
|                     | IS                      | TS   | IS                       | TS   | IS               | TS    |                 |                 |                 |                |
| Clean MoP(010)      | 2.06                    | 3.60 | 0.28                     | 0.33 | -4.89            | -5.74 | 1.54            | 0.05            | -0.85           | 0.74           |
| S-modified MoP(010) | 1.96                    | 3.10 | 0.30                     | 0.37 | -4.54            | -5.26 | 1.14            | 0.07            | -0.72           | 0.49           |

$E_{\text{a1}} = (\delta E_{\text{ads}}^{\text{TS}} - \delta E_{\text{ads}}^{\text{IS}})$ ,  $E_{\text{a2}} = (\delta E_{\text{surf}}^{\text{TS}} - \delta E_{\text{surf}}^{\text{IS}})$  and  $E_{\text{a3}} = (E_{\text{int}}^{\text{TS}} - E_{\text{int}}^{\text{IS}})$

#### Notes and references

- 1 Z. X. Yang and T. X. Woo, *J. Chem. Phys.*, 2004, **120**, 7741–7749.
- 2 H.-T. Chen, Y. M. Choi and M. L. Liu, *ChemPhysChem*, 2007, **8**, 849–855.
- 3 P. B. Liescheski and D. W. H. Rankin, *J. Mol. Struct.*, 1988, **178**, 227–241.
- 4 G. X. Li, H. Y. Zhu, L. M. Zhao, W. Y. Guo, H. F. Ma, Y. C. Yu, X. Q. Lu and Y. J. Liu, *J. Phys. Chem. C*, 2016, **120**, 23009–23023.
